# Supplementary material for: 4,5-Diiodo-1-H-imidazole-derived linker ligand and Cu(i) and Co(ii) coordination polymers based thereupon
Source: Royal Society of Chemistry journal article supplement (doi:10.1039/d4ce00072b), 2024-01-01
Supplement: d4ce00072b1.pdf [file d4ce00072b1.pdf]

## Supplementary Information

### 4,5-diiodo-1-H-imidazole-derived linker ligand and Cu(I) and Co(II) coordination polymers based thereupon

**Single crystal X-ray Diffractometry.** The diffraction data for **1-3** were collected on a Bruker D8 Venture diffractometer (0.5°  $\omega$ - and  $\phi$ -scans, fixed- $\chi$  three circle goniometer, CMOS PHOTON III detector, Mo- $\mu$ S 3.0 microfocus source, focusing Montel mirrors,  $\lambda = 0.71073 \text{ \AA}$  MoK $_{\alpha}$  radiation, N $_2$ -flow thermostat) at 150 K (**1, 3**) and 200 K (**2**). Absorption correction was applied by SADABS (Bruker Apex3 software suite: Apex3, SADABS-2016/2<sup>1</sup> and SAINT, version 2018.7-2; Bruker AXS Inc.: Madison, WI, 2017.). Structures were solved by SHELXT<sup>2</sup> and refined by full-matrix least-squares treatment against  $|F|^2$  in anisotropic approximation with SHELXL 2017/1<sup>3</sup> assisted with OLEX2 1.5 GUI<sup>4</sup>. In **2**, OLEX2 Solvent Mask Procedure was applied due to severe disorder of DMF solvate molecules. The available volume is estimated to be 240  $\text{\AA}^3$  per [Co(BimB-I4)Cl $_2$ ] formula unit. The structures of **1-3** were deposited to the Cambridge Crystallographic Data Centre (CCDC) as a supplementary publication, No. **2313127-2313129**.

- (1) Krause, L.; Herbst-Irmer, R.; Sheldrick, G. M.; Stalke, D. Comparison of Silver and Molybdenum Microfocus X-Ray Sources for Single-Crystal Structure Determination. *J. Appl. Crystallogr.* **2015**, *48* (1), 3–10. <https://doi.org/10.1107/S1600576714022985>.
- (2) Sheldrick, G. M. SHELXT – Integrated Space-Group and Crystal-Structure Determination. *Acta Crystallogr. Sect. A Found. Adv.* **2015**, *71* (1), 3–8. <https://doi.org/10.1107/S2053273314026370>.
- (3) Sheldrick, G. M. Crystal Structure Refinement with SHELXL. *Acta Crystallogr. Sect. C Struct. Chem.* **2015**, *71* (1), 3–8. <https://doi.org/10.1107/S2053229614024218>.
- (4) Dolomanov, O. V.; Bourhis, L. J.; Gildea, R. J.; Howard, J. A. K.; Puschmann, H. OLEX2 : A Complete Structure Solution, Refinement and Analysis Program. *J. Appl. Crystallogr.* **2009**, *42* (2), 339–341. <https://doi.org/10.1107/S0021889808042726>.

**Powder X-ray Diffractometry.** XRD analysis of polycrystals was performed on Shimadzu XRD-7000 diffractometer (CuK-alpha radiation, Ni – filter, linear One Sight detector, 0.0143° 2 $\theta$  step, 2s per step). Plotting of PXRD patterns and data treatment was performed using X'Pert Plus software.

Table S1. Crystal data and structure refinement for 1–3.

| Identification code                         | 1                                                                                                                                                                        | 2                                                                                                                                                                        | 3                                                                                                                                                                        |
|---------------------------------------------|--------------------------------------------------------------------------------------------------------------------------------------------------------------------------|--------------------------------------------------------------------------------------------------------------------------------------------------------------------------|--------------------------------------------------------------------------------------------------------------------------------------------------------------------------|
| CCDC number                                 | 2313127                                                                                                                                                                  | 2313128                                                                                                                                                                  | 2313129                                                                                                                                                                  |
| Empirical formula                           | C <sub>10</sub> H <sub>10</sub> I <sub>4</sub> N <sub>4</sub>                                                                                                            | C <sub>10</sub> H <sub>10</sub> Cl <sub>2</sub> CoI <sub>4</sub> N <sub>4</sub><br>1.5[C <sub>3</sub> H <sub>7</sub> NO]                                                 | C <sub>10</sub> H <sub>10</sub> Cu <sub>2</sub> I <sub>6</sub> N <sub>4</sub>                                                                                            |
| M, g/mol                                    | 693.82                                                                                                                                                                   | 933.29                                                                                                                                                                   | 1074.70                                                                                                                                                                  |
| Temperature/K                               | 150                                                                                                                                                                      | 200                                                                                                                                                                      | 150                                                                                                                                                                      |
| Crystal system                              | Orthorhombic                                                                                                                                                             | Monoclinic                                                                                                                                                               | Monoclinic                                                                                                                                                               |
| Space group                                 | <i>Pbca</i>                                                                                                                                                              | <i>C2/c</i>                                                                                                                                                              | <i>P2<sub>1</sub>/n</i>                                                                                                                                                  |
| a, Å                                        | 8.7171 (3)                                                                                                                                                               | 12.379 (6)                                                                                                                                                               | 11.0164 (5)                                                                                                                                                              |
| b, Å                                        | 12.9296 (5)                                                                                                                                                              | 16.228 (7)                                                                                                                                                               | 15.4161 (6)                                                                                                                                                              |
| c, Å                                        | 14.2643 (5)                                                                                                                                                              | 14.155 (10)                                                                                                                                                              | 12.9223 (5)                                                                                                                                                              |
| α, deg.                                     | 90                                                                                                                                                                       | 90                                                                                                                                                                       | 90                                                                                                                                                                       |
| β, deg.                                     | 90                                                                                                                                                                       | 107.332 (16)                                                                                                                                                             | 103.359 (2)                                                                                                                                                              |
| γ, deg.                                     | 90                                                                                                                                                                       | 90                                                                                                                                                                       | 90                                                                                                                                                                       |
| Volume, Å <sup>3</sup>                      | 1607.71 (10)                                                                                                                                                             | 2715 (3)                                                                                                                                                                 | 2135.21 (15)                                                                                                                                                             |
| Z                                           | 4                                                                                                                                                                        | 4                                                                                                                                                                        | 4                                                                                                                                                                        |
| ρ <sub>calc</sub> , g/cm <sup>3</sup>       | 2.866                                                                                                                                                                    | 2.284                                                                                                                                                                    | 3.343                                                                                                                                                                    |
| μ, mm <sup>-1</sup>                         | 7.74                                                                                                                                                                     | 5.40                                                                                                                                                                     | 10.67                                                                                                                                                                    |
| F(000)                                      | 1240                                                                                                                                                                     | 1724                                                                                                                                                                     | 1896                                                                                                                                                                     |
| Crystal size, mm                            | 0.17 × 0.14 × 0.1                                                                                                                                                        | 0.18 × 0.12 × 0.03                                                                                                                                                       | 0.18 × 0.11 × 0.06                                                                                                                                                       |
| θ range for data collection, deg.           | 3.151 to 31.513                                                                                                                                                          | 28.697 to 2.296                                                                                                                                                          | 29.592 to 2.090                                                                                                                                                          |
| Tmin, Tmax                                  | 0.398, 0.605                                                                                                                                                             | 0.670, 0.746                                                                                                                                                             | 0.477, 0.746                                                                                                                                                             |
| Range of h, k, l                            | -11 ≤ h ≤ 12, -18 ≤<br>k ≤ 18, -20 ≤ l ≤ 19                                                                                                                              | -16 ≤ h ≤ 16, -21 ≤<br>k ≤ 21, -18 ≤ l ≤ 19                                                                                                                              | -15 ≤ h ≤ 15, -19 ≤<br>k ≤ 21, -17 ≤ l ≤ 17                                                                                                                              |
| (sin θ/λ) <sub>max</sub> (Å <sup>-1</sup> ) | 0.735                                                                                                                                                                    | 0.676                                                                                                                                                                    | 0.695                                                                                                                                                                    |
| R <sub>int</sub>                            | 0.026                                                                                                                                                                    | 0.049                                                                                                                                                                    | 0.034                                                                                                                                                                    |
| Reflections collected/independent           | 28635, 2606                                                                                                                                                              | 25734, 3493                                                                                                                                                              | 40970, 5975                                                                                                                                                              |
| Reflections with I > 2σ(I)                  | 2540                                                                                                                                                                     | 2744                                                                                                                                                                     | 5500                                                                                                                                                                     |
| Data/restraints/parameters                  | 2606/0/82                                                                                                                                                                | 3493/0/100                                                                                                                                                               | 5975/0/199                                                                                                                                                               |
| Goodness-of-fit on F <sup>2</sup>           | 1.195                                                                                                                                                                    | 1.040                                                                                                                                                                    | 1.050                                                                                                                                                                    |
| Final R indexes [I ≥ 2σ(I)]                 | R <sub>1</sub> = 0.0134, wR <sub>2</sub> =<br>0.0311                                                                                                                     | R <sub>1</sub> = 0.0268, wR <sub>2</sub> =<br>0.0561                                                                                                                     | R <sub>1</sub> = 0.0195, wR <sub>2</sub> =<br>0.0435                                                                                                                     |
| Final R indexes [all data]                  | R <sub>1</sub> = 0.0139, wR <sub>2</sub> =<br>0.0313                                                                                                                     | R <sub>1</sub> = 0.0378, wR <sub>2</sub> =<br>0.0589                                                                                                                     | R <sub>1</sub> = 0.0221, wR <sub>2</sub> =<br>0.0447                                                                                                                     |
| Weighting scheme                            | w = 1/[σ <sup>2</sup> (F <sub>o</sub> <sup>2</sup> ) + (0.0072P) <sup>2</sup> +<br>1.1732P]<br>where P = (F <sub>o</sub> <sup>2</sup> + 2F <sub>c</sub> <sup>2</sup> )/3 | w = 1/[σ <sup>2</sup> (F <sub>o</sub> <sup>2</sup> ) + (0.0233P) <sup>2</sup> +<br>2.5927P]<br>where P = (F <sub>o</sub> <sup>2</sup> + 2F <sub>c</sub> <sup>2</sup> )/3 | w = 1/[σ <sup>2</sup> (F <sub>o</sub> <sup>2</sup> ) + (0.016P) <sup>2</sup> + 3.<br>5104P]<br>where P = (F <sub>o</sub> <sup>2</sup> + 2F <sub>c</sub> <sup>2</sup> )/3 |
| (Δ/σ) <sub>max</sub>                        | 0.002                                                                                                                                                                    | 0.001                                                                                                                                                                    | 0.003                                                                                                                                                                    |
| Largest diff. peak/hole, e/Å <sup>3</sup>   | 0.47, -0.48                                                                                                                                                              | 0.73, -0.86                                                                                                                                                              | 1.03, -0.91                                                                                                                                                              |

Computer programs: SHELXT 2014/5 (Sheldrick, 2014), SHELXL 2017/1 (Sheldrick, 2015), Olex2 1.5 (Dolomanov et al., 2009).

**Table S2.** Selected bond lengths and angles for **1**.

| <b>Bond length, Å</b>  |             |                       |             |
|------------------------|-------------|-----------------------|-------------|
| I1—C1                  | 2.0695 (14) | N2—C4                 | 1.4709 (19) |
| I2—C2                  | 2.0631 (14) | N2—C3                 | 1.357 (2)   |
| C1—N1                  | 1.3689 (19) | N1—C3                 | 1.324 (2)   |
| C1—C2                  | 1.3745 (19) | C4—C5                 | 1.520 (2)   |
| N2—C2                  | 1.3786 (18) | C5—C5 <sup>i</sup>    | 1.526 (3)   |
| <b>Bond angle, (°)</b> |             |                       |             |
| N1—C1—I1               | 121.53 (10) | C1—C2—I2              | 130.79 (11) |
| N1—C1—C2               | 111.42 (13) | C1—C2—N2              | 105.11 (12) |
| C2—C1—I1               | 127.02 (11) | N2—C2—I2              | 123.95 (10) |
| C2—N2—C4               | 128.39 (13) | N2—C4—C5              | 113.14 (12) |
| C3—N2—C2               | 106.53 (12) | C4—C5—C5 <sup>i</sup> | 109.61 (15) |
| C3—N2—C4               | 124.99 (13) | N1—C3—N2              | 112.89 (13) |
| C3—N1—C1               | 104.05 (13) |                       |             |
|                        |             |                       |             |

Symmetry code(s): (i)  $-x+2, -y+1, -z+1$ .**Table S3.** Selected bond lengths and angles for **2**.

| <b>Bond length, Å</b>                 |             |                        |           |
|---------------------------------------|-------------|------------------------|-----------|
| I2—C2                                 | 2.073 (3)   | N2—C3                  | 1.342 (4) |
| I1—C1                                 | 2.068 (3)   | N2—C2                  | 1.378 (4) |
| Co1—Cl1                               | 2.2528 (14) | N2—C4                  | 1.473 (4) |
| Co1—Cl1 <sup>i</sup>                  | 2.2528 (14) | C1—C2                  | 1.361 (4) |
| Co1—N1 <sup>i</sup>                   | 2.014 (3)   | C1—I1A                 | 2.034 (6) |
| Co1—N1                                | 2.014 (3)   | C5—C5 <sup>ii</sup>    | 1.542 (6) |
| N1—C3                                 | 1.333 (4)   | C5—C4                  | 1.521 (5) |
| N1—C1                                 | 1.385 (4)   |                        |           |
| <b>Bond angle, (°)</b>                |             |                        |           |
| Cl1 <sup>i</sup> —Co1—Cl1             | 113.88 (6)  | N1—C3—N2               | 111.4 (3) |
| N1—Co1—Cl1 <sup>i</sup>               | 114.78 (8)  | N1—C1—I1               | 122.2 (2) |
| N1 <sup>i</sup> —Co1—Cl1              | 114.78 (8)  | N1—C1—I1A              | 123.7 (3) |
| N1 <sup>i</sup> —Co1—Cl1 <sup>i</sup> | 104.23 (8)  | C2—C1—I1               | 127.8 (2) |
| N1—Co1—Cl1                            | 104.23 (8)  | C2—C1—N1               | 109.9 (3) |
| N1 <sup>i</sup> —Co1—N1               | 104.89 (17) | C2—C1—I1A              | 122.9 (3) |
| C3—N1—Co1                             | 124.9 (2)   | N2—C2—I2               | 123.0 (2) |
| C3—N1—C1                              | 105.1 (3)   | C1—C2—I2               | 131.0 (2) |
| C1—N1—Co1                             | 129.6 (2)   | C1—C2—N2               | 105.9 (3) |
| C3—N2—C2                              | 107.6 (3)   | C4—C5—C5 <sup>ii</sup> | 110.2 (4) |
| C3—N2—C4                              | 124.8 (3)   | N2—C4—C5               | 110.9 (3) |
| C2—N2—C4                              | 127.5 (3)   |                        |           |

Symmetry code(s): (i)  $-x+1, y, -z+3/2$ ; (ii)  $-x+3/2, -y+3/2, -z+1$ .

**Table S4.** Selected bond lengths and angles for **3**.

| Bond length, Å            |              |                                       |              |
|---------------------------|--------------|---------------------------------------|--------------|
| I1—C1                     | 2.064 (3)    | I6—Cu2                                | 2.5557 (4)   |
| I2—C2                     | 2.069 (3)    | I6—Cu2 <sup>i</sup>                   | 2.6102 (4)   |
| I3—C9                     | 2.052 (3)    | Cu1—Cu2                               | 2.8620 (6)   |
| I4—C8                     | 2.066 (3)    | Cu1—N1 <sup>ii</sup>                  | 1.988 (2)    |
| I5—Cu1                    | 2.6533 (4)   | Cu1—N4                                | 1.973 (2)    |
| I5—Cu2                    | 2.5076 (4)   | Cu2—Cu2 <sup>i</sup>                  | 2.6264 (8)   |
| I6—Cu1                    | 3.0411 (5)   |                                       |              |
| Bond angle, (°)           |              |                                       |              |
| Cu2—I5—Cu1                | 67.290 (14)  | I5—Cu2—I6 <sup>i</sup>                | 116.177 (16) |
| Cu2—I6—Cu1                | 60.777 (12)  | I5—Cu2—I6                             | 124.843 (17) |
| Cu2 <sup>i</sup> —I6—Cu1  | 120.691 (13) | I5—Cu2—Cu1                            | 58.784 (12)  |
| Cu2—I6—Cu2 <sup>i</sup>   | 61.105 (15)  | I5—Cu2—Cu2 <sup>i</sup>               | 173.91 (3)   |
| I5—Cu1—I6                 | 103.815 (15) | I6—Cu2—I6 <sup>i</sup>                | 118.895 (15) |
| I5—Cu1—Cu2                | 53.925 (12)  | I6 <sup>i</sup> —Cu2—Cu1              | 166.865 (18) |
| Cu2—Cu1—I6                | 51.198 (11)  | I6—Cu2—Cu1                            | 68.026 (13)  |
| N1 <sup>ii</sup> —Cu1—I6  | 109.28 (7)   | I6—Cu2—Cu2 <sup>i</sup>               | 60.473 (15)  |
| N1 <sup>ii</sup> —Cu1—I6  | 96.81 (7)    | I6 <sup>i</sup> —Cu2—Cu2 <sup>i</sup> | 58.422 (15)  |
| N1 <sup>ii</sup> —Cu1—Cu2 | 120.80 (7)   | Cu2 <sup>i</sup> —Cu2—Cu1             | 127.14 (2)   |
| N4—Cu1—I5                 | 111.08 (7)   | C1—N1—Cu1 <sup>iii</sup>              | 126.80 (18)  |
| N4—Cu1—I6                 | 106.26 (7)   | C3—N1—Cu1 <sup>iii</sup>              | 127.4 (2)    |
| N4—Cu1—Cu2                | 111.35 (7)   | C8—N4—Cu1                             | 130.06 (18)  |
| N4—Cu1—N1 <sup>ii</sup>   | 126.26 (10)  | C10—N4—Cu1                            | 124.83 (19)  |

Symmetry code(s): (i)  $-x+1, -y, -z+2$ ; (ii)  $x, y, z+1$ ; (iii)  $x, y, z-1$ .

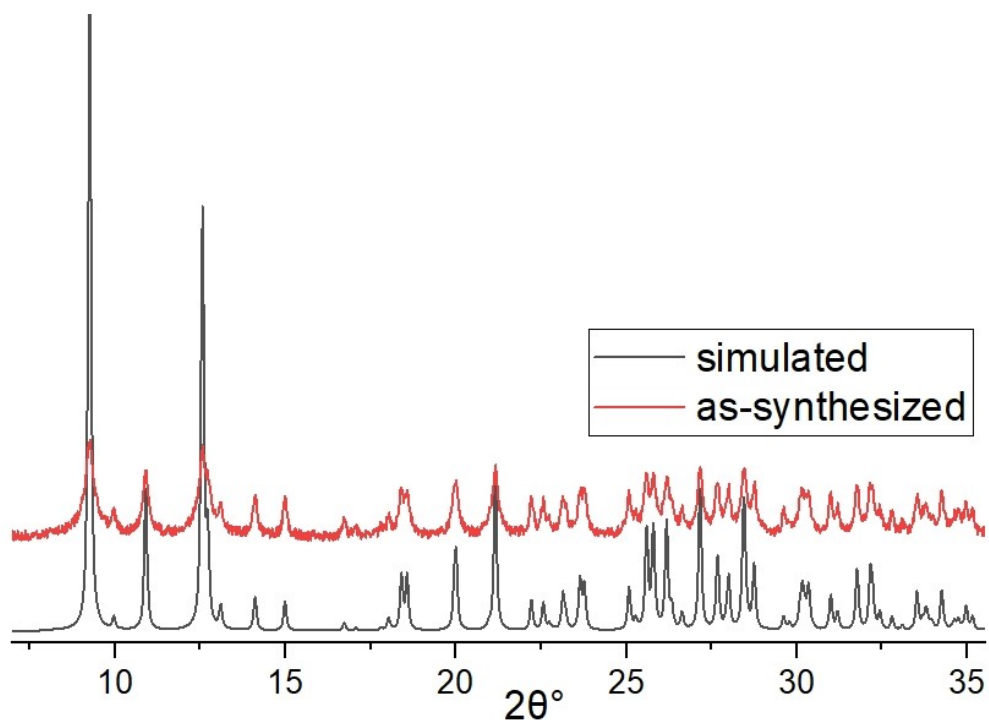

**Figure 1S.** PXRD data for **2**

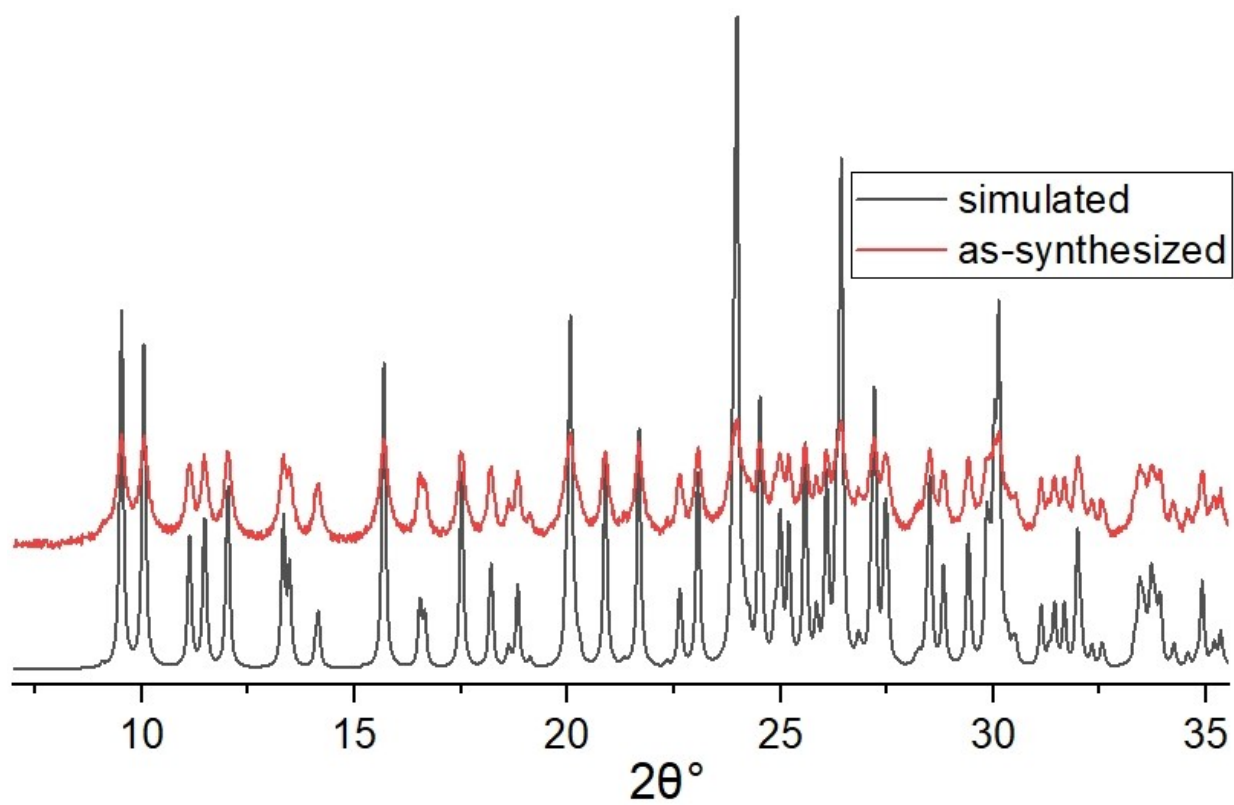

Figure 2S. PXRD data for 3

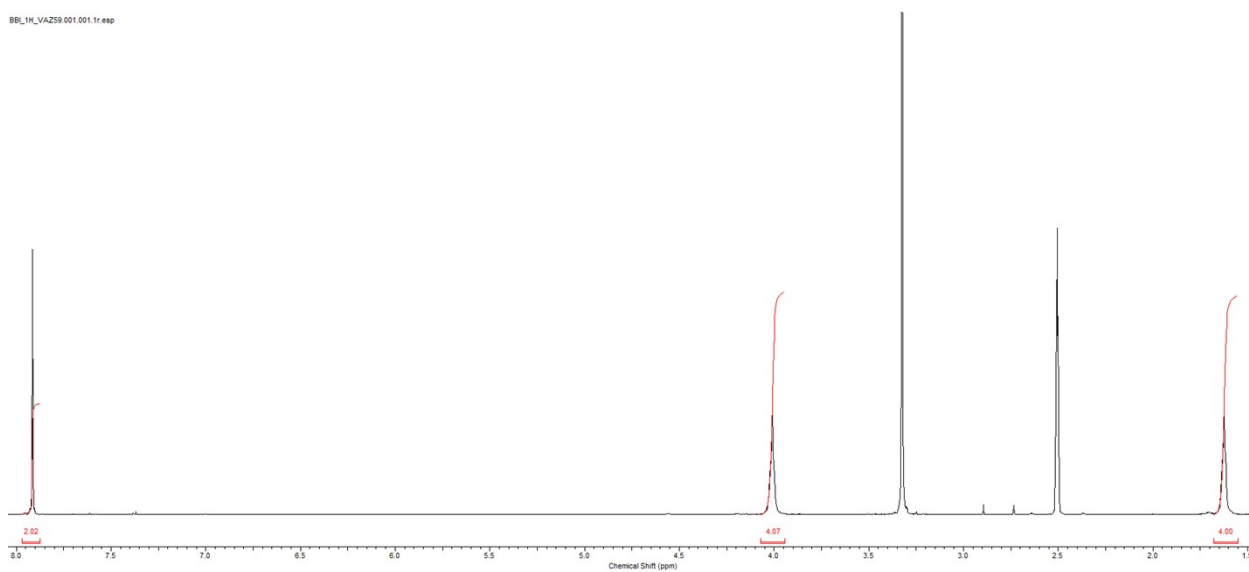

Figure 3S.  $^1\text{H}$  NMR spectrum of 1 ( $\text{d}^6$ -DMSO)

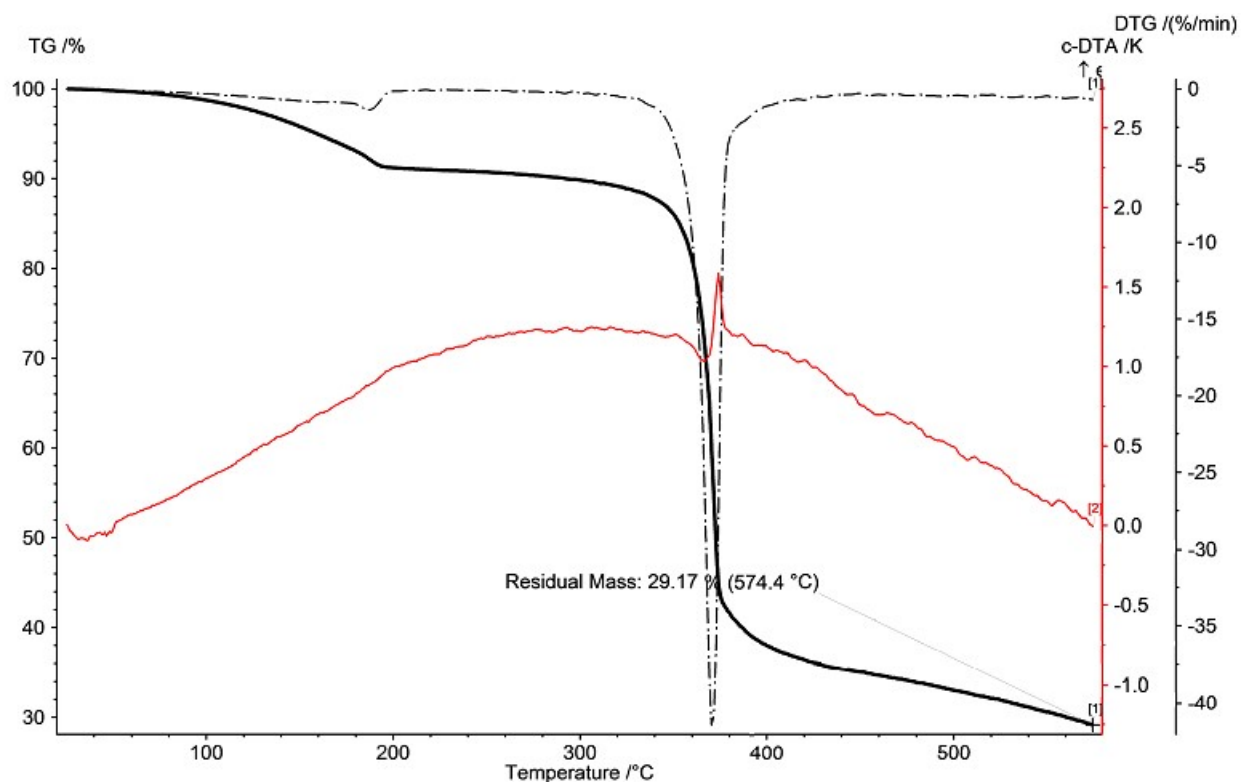

Figure 4S. TGA experiment for 2

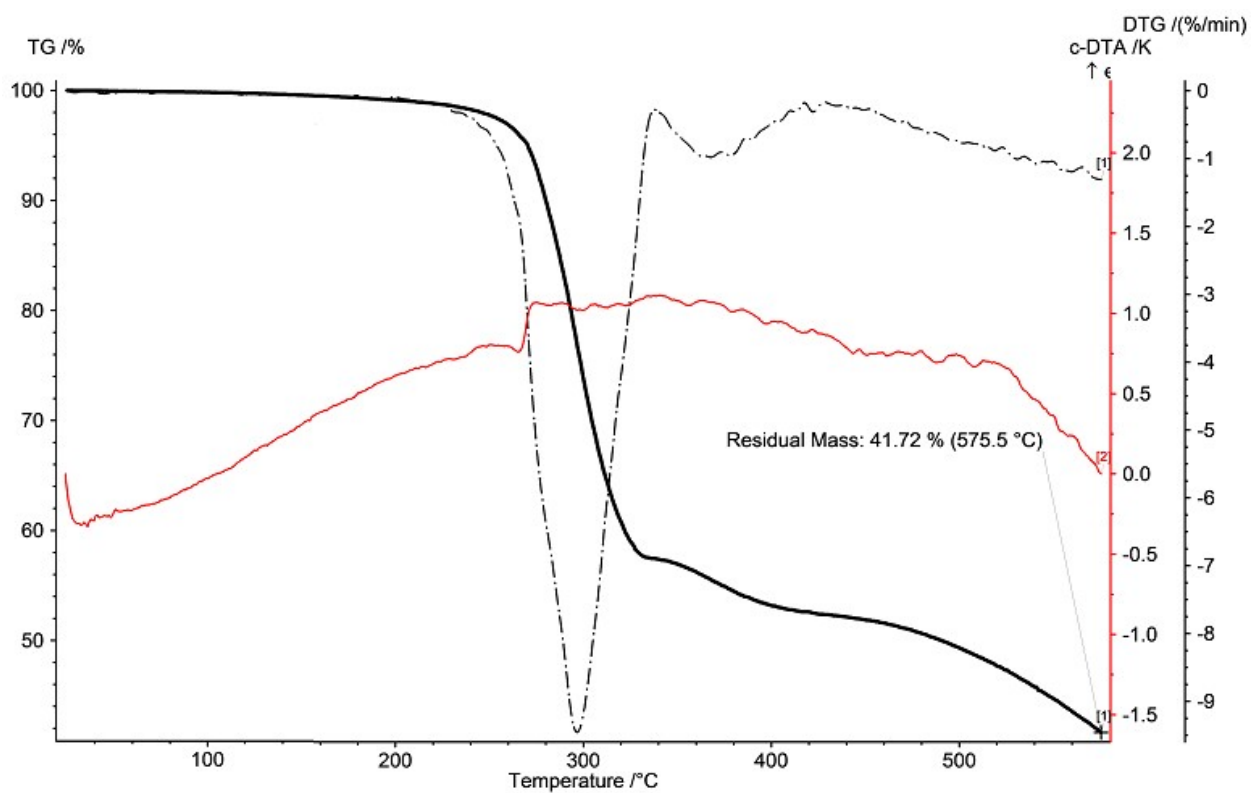

Figure 5S. TGA experiment for 3

## Computational details

The single point calculations based on the experimental X-ray geometries of **1–3** have been carried out at the DFT level of theory using the dispersion-corrected hybrid functional  $\omega$ B97XD [Phys. Chem. Chem. Phys. 2008, 10, 6615.] with the help of Gaussian-09 [M. J. Frisch et al. Gaussian 09, Revision C.01, Gaussian, Inc., Wallingford, CT, 2010.] program package. The Douglas–Kroll–Hess 2<sup>nd</sup> order scalar relativistic calculations requested relativistic core Hamiltonian were carried out using the DZP-DKH basis sets [Mol. Phys. 2010, 108, 1965. || J. Chem. Phys. 2009, 130, 064108. || Chem. Phys. Lett. 2013, 582, 158. || J. Mol. Struct. - Theochem 2010, 961, 107.] for all atoms. The topological analysis of the electron density distribution has been performed by using the Multiwfn program (version 3.7) [J. Comput. Chem. 2012, 33, 580.]. The Cartesian atomic coordinates for model supramolecular associates are presented in **Table S5**, Supporting Information.

**Table S5.** Values of the density of all electrons –  $\rho(\mathbf{r})$ , Laplacian of electron density –  $\nabla^2\rho(\mathbf{r})$  and appropriate  $\lambda_2$  eigenvalues, energy density –  $H_b$ , potential energy density –  $V(\mathbf{r})$ , and Lagrangian kinetic energy –  $G(\mathbf{r})$  (a.u.) at the bond critical points (3, –1) corresponding to various halogen bonds I...I, I...Cl, and I...Cu in the X-ray structures **1–3**, and estimated strength for these noncovalent interactions  $E_{int}$  (kcal/mol).

| Contact*           | % <sub>vdw sum</sub> | $\rho(\mathbf{r})$ | $\nabla^2\rho(\mathbf{r})$ | $\lambda_2$ | $H_b$ | $V(\mathbf{r})$ | $G(\mathbf{r})$ | $E_{int}^{**}$ |
|--------------------|----------------------|--------------------|----------------------------|-------------|-------|-----------------|-----------------|----------------|
| <b>1</b>           |                      |                    |                            |             |       |                 |                 |                |
| I30...I1 3.784 Å   | 96                   | 0.009              | 0.033                      | -0.009      | 0.001 | -0.006          | 0.007           | 2.6            |
| <b>2</b>           |                      |                    |                            |             |       |                 |                 |                |
| I60...Cl31 3.246 Å | 87                   | 0.016              | 0.051                      | -0.016      | 0.001 | -0.011          | 0.012           | 4.7            |
| I30...I1 3.909 Å   | 99                   | 0.007              | 0.028                      | -0.007      | 0.002 | -0.004          | 0.006           | 1.7            |
| I93...Cl4 4.031 Å  | 108                  | 0.004              | 0.014                      | -0.004      | 0.001 | -0.002          | 0.003           | 0.9            |
| <b>3</b>           |                      |                    |                            |             |       |                 |                 |                |
| I68...I5 3.681 Å   | 93                   | 0.013              | 0.050                      | -0.013      | 0.001 | -0.011          | 0.012           | 4.7            |
| I3...I38 3.796 Å   | 96                   | 0.009              | 0.033                      | -0.009      | 0.001 | -0.006          | 0.007           | 2.6            |
| I66...I33 3.793 Å  | 96                   | 0.010              | 0.033                      | -0.010      | 0.001 | -0.006          | 0.007           | 2.6            |
| I37...I2 4.033 Å   | 102                  | 0.004              | 0.013                      | -0.004      | 0.001 | -0.001          | 0.002           | 0.4            |
| I66...Cu8 3.485 Å  | 103                  | 0.009              | 0.028                      | -0.009      | 0.001 | -0.006          | 0.007           | 2.6            |

\* The Bondi's (shortest) van der Waals radii for iodine, chlorine, and copper atoms are 1.98, 1.75, and 1.40 Å, respectively [J. Phys. Chem. 1966, 70, 3006.]. The numeration of atoms corresponds to their ordering in attached xyz-files for model supramolecular associates.

\*\*  $E_{int} = 0.68(-V(\mathbf{r}))$  (this empirical correlation between the interaction energy and the potential energy density of electrons at the bond critical points (3, –1) was specifically developed for halogen bonds involving iodine atoms) [Russ. Chem. Rev. 2014, 83, 1181.]

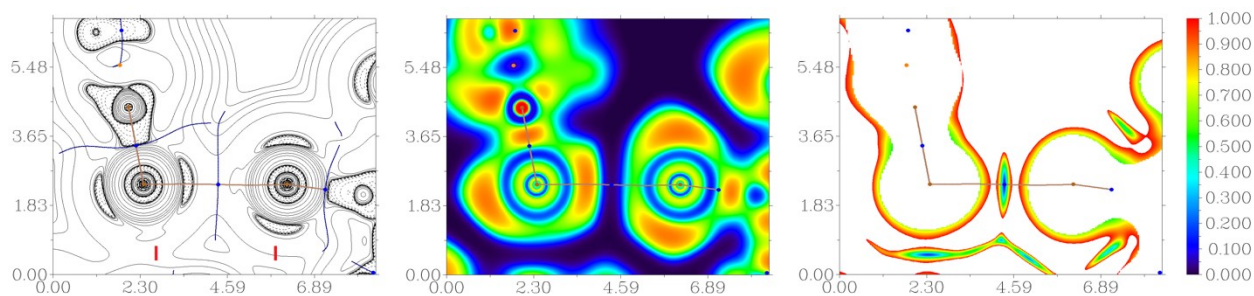

**Figure 6S.** Contour line diagram of the Laplacian of electron density distribution  $\nabla^2\rho(\mathbf{r})$ , bond paths, and selected zero-flux surfaces (left panel), visualization of electron localization function (ELF, center panel) and reduced density gradient (RDG, right panel) analyses for halogen bonds I...I in **1**. Bond critical points (3, -1) are shown in blue, nuclear critical points (3, -3) – in pale brown, ring critical points (3, +1) – in orange, length units – Å, and the color scale for the ELF and RDG maps is presented in a.u.

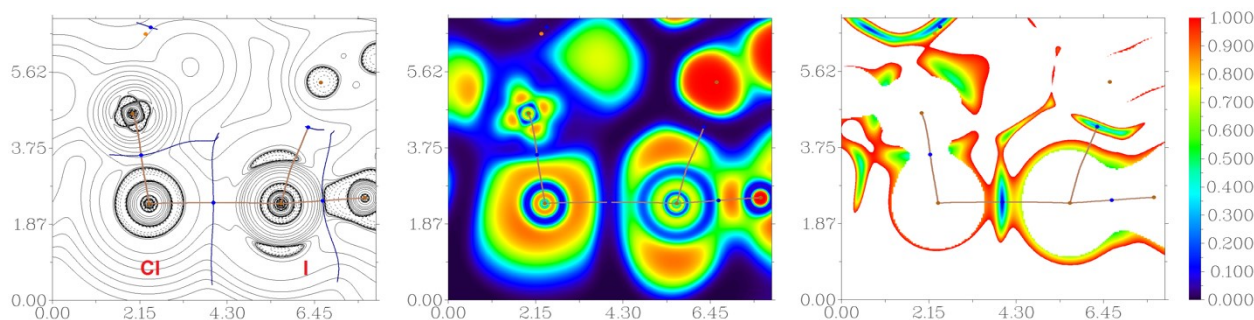

**Figure 7S.** Contour line diagram of the Laplacian of electron density distribution  $\nabla^2\rho(\mathbf{r})$ , bond paths, and selected zero-flux surfaces (left panel), visualization of electron localization function (ELF, center panel) and reduced density gradient (RDG, right panel) analyses for halogen bonds I...Cl in **2**. Bond critical points (3, -1) are shown in blue, nuclear critical points (3, -3) – in pale brown, ring critical points (3, +1) – in orange, length units – Å, and the color scale for the ELF and RDG maps is presented in a.u.

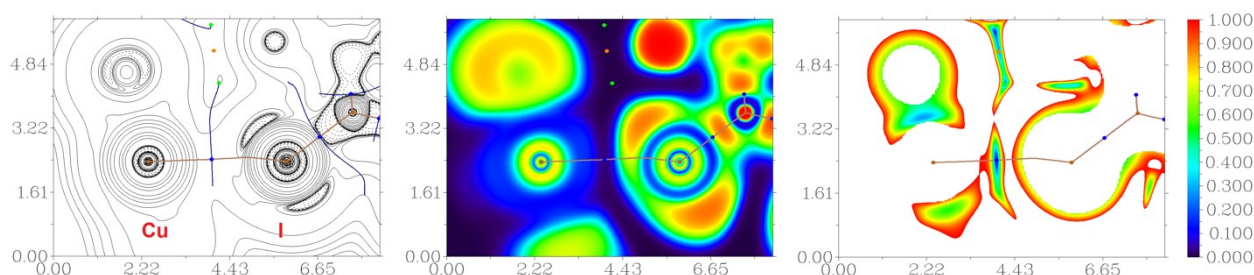

**Figure 8S.** Contour line diagram of the Laplacian of electron density distribution  $\nabla^2\rho(\mathbf{r})$ , bond paths, and selected zero-flux surfaces (left panel), visualization of electron localization function (ELF, center panel) and reduced density gradient (RDG, right panel) analyses for halogen bonds I...Cu in **3**. Bond critical points (3, -1) are shown in blue, nuclear critical points (3, -3) – in pale brown, ring critical points (3, +1) – in orange, cage critical points (3, +3) – in light green, length units – Å, and the color scale for the ELF and RDG maps is presented in a.u.



The QTAIM analysis of model supramolecular associates demonstrates the presence of bond critical points (3, -1) for various halogen bonds I...I, I...Cl, and I...Cu in the X-ray structures **1–3**. The low magnitude of the electron density (0.004–0.016 a.u.), positive values of the Laplacian of electron density (0.013–0.051 a.u.), and very close to zero positive energy density (0.001–0.002 a.u.) in these bond critical points (3, -1) and estimated strength for appropriate short contacts (0.4–4.7 kcal/mol) are typical for noncovalent interactions involving halogen atoms in similar chemical systems [Zeitschrift für Kristallographie-Crystalline Materials 2018 233 (6), 371-377; Crystal Growth & Design 2011 21 (2), 1136-1147; CrystEngComm 2019 21 (5), 850-856; CrystEngComm 2020 22 (3), 554-563; CrystEngComm 2019 21 (43), 6666-6670]. The balance between the Lagrangian kinetic energy  $G(\mathbf{r})$  and potential energy density  $V(\mathbf{r})$  at the bond critical points (3, -1) reveals the nature of these interactions, if the ratio  $-G(\mathbf{r})/V(\mathbf{r}) > 1$  is satisfied, than the nature of appropriate interaction is purely non-covalent, in case the  $-G(\mathbf{r})/V(\mathbf{r}) < 1$  some covalent component takes place [J. Chem. Phys. 2002, 117, 5529.]; based on this criterion one can state that a covalent contribution in all halogen bonds I...I, I...Cl, and I...Cu in the X-ray structures **1–3** is absent. The Laplacian of electron density is typically decomposed into the sum of contributions along the three principal axes of maximal variation, giving the three eigenvalues of the Hessian matrix ( $\lambda_1$ ,  $\lambda_2$  and  $\lambda_3$ ), and the sign of  $\lambda_2$  can be utilized to distinguish bonding (attractive,  $\lambda_2 < 0$ ) weak interactions from non-bonding ones (repulsive,  $\lambda_2 > 0$ ). [J. Am. Chem. Soc. 2010, 132, 6498. || J. Chem. Theory Comput. 2011, 7, 625.] Thus, all discussed intermolecular interactions I...I, I...Cl, and I...Cu in the X-ray structures **1–3** are attractive .

**Table S6.** Cartesian atomic coordinates for model supramolecular associates.

| Atom     | X         | Y        | Z         |
|----------|-----------|----------|-----------|
| <b>1</b> |           |          |           |
| I        | 2.856855  | 8.697483 | 3.903711  |
| I        | 5.087910  | 5.554815 | 4.867978  |
| C        | 4.383045  | 8.583056 | 5.296620  |
| N        | 5.970516  | 7.889642 | 6.629619  |
| N        | 4.770171  | 9.675220 | 6.025811  |
| C        | 5.100985  | 7.464905 | 5.647807  |
| C        | 6.927654  | 7.090722 | 7.410161  |
| H        | 6.510741  | 6.222215 | 7.638333  |
| H        | 7.124756  | 7.562911 | 8.257703  |
| C        | 8.232168  | 6.833681 | 6.673267  |
| H        | 8.630356  | 7.694095 | 6.388067  |
| H        | 8.057913  | 6.290173 | 5.864325  |
| C        | 5.729488  | 9.212728 | 6.812772  |
| H        | 6.199514  | 9.750263 | 7.439332  |
| I        | 14.577345 | 4.232117 | 10.360589 |
| I        | 12.346290 | 7.374785 | 9.396322  |
| C        | 13.051155 | 4.346544 | 8.967680  |
| N        | 11.463684 | 5.039958 | 7.634681  |
| N        | 12.664029 | 3.254380 | 8.238489  |
| C        | 12.333215 | 5.464695 | 8.616493  |
| C        | 10.506546 | 5.838878 | 6.854139  |
| H        | 10.923459 | 6.707385 | 6.625967  |
| H        | 10.309444 | 5.366689 | 6.006597  |
| C        | 9.202032  | 6.095919 | 7.591033  |
| H        | 8.803844  | 5.235505 | 7.876233  |
| H        | 9.376287  | 6.639427 | 8.399975  |

|   |           |           |           |
|---|-----------|-----------|-----------|
| C | 11.704712 | 3.716872  | 7.451528  |
| H | 11.234686 | 3.179337  | 6.824968  |
| I | 5.860245  | 15.162283 | 3.228439  |
| I | 3.629190  | 12.019615 | 2.264172  |
| C | 4.334055  | 15.047856 | 1.835530  |
| N | 2.746584  | 14.354442 | 0.502531  |
| N | 3.946929  | 16.140020 | 1.106339  |
| C | 3.616115  | 13.929705 | 1.484343  |
| C | 1.789446  | 13.555522 | -0.278011 |
| H | 2.206359  | 12.687015 | -0.506183 |
| H | 1.592344  | 14.027711 | -1.125553 |
| C | 0.484932  | 13.298481 | 0.458883  |
| H | 0.086744  | 14.158895 | 0.744083  |
| H | 0.659187  | 12.754973 | 1.267825  |
| C | 2.987612  | 15.677528 | 0.319378  |
| H | 2.517586  | 16.215063 | -0.307182 |
| I | -5.860245 | 10.696917 | -3.228439 |
| I | -3.629190 | 13.839585 | -2.264172 |
| C | -4.334055 | 10.811344 | -1.835530 |
| N | -2.746584 | 11.504758 | -0.502531 |
| N | -3.946929 | 9.719180  | -1.106339 |
| C | -3.616115 | 11.929495 | -1.484343 |
| C | -1.789446 | 12.303678 | 0.278011  |
| H | -2.206359 | 13.172185 | 0.506183  |
| H | -1.592344 | 11.831489 | 1.125553  |
| C | -0.484932 | 12.560719 | -0.458883 |
| H | -0.086744 | 11.700305 | -0.744083 |
| H | -0.659187 | 13.104227 | -1.267825 |
| C | -2.987612 | 10.181672 | -0.319378 |
| H | -2.517586 | 9.644137  | 0.307182  |
| I | 10.218795 | 4.232117  | -3.228439 |
| I | 7.987740  | 7.374785  | -2.264172 |
| C | 8.692605  | 4.346544  | -1.835530 |
| N | 7.105134  | 5.039958  | -0.502531 |
| N | 8.305479  | 3.254380  | -1.106339 |
| C | 7.974665  | 5.464695  | -1.484343 |
| C | 6.147996  | 5.838878  | 0.278011  |
| H | 6.564909  | 6.707385  | 0.506183  |
| H | 5.950894  | 5.366689  | 1.125553  |
| C | 4.843482  | 6.095919  | -0.458883 |
| H | 4.445294  | 5.235505  | -0.744083 |
| H | 5.017737  | 6.639427  | -1.267825 |
| C | 7.346162  | 3.716872  | -0.319378 |
| H | 6.876136  | 3.179337  | 0.307182  |
| I | -1.501695 | 8.697483  | 3.228439  |
| I | 0.729360  | 5.554815  | 2.264172  |
| C | 0.024495  | 8.583056  | 1.835530  |
| N | 1.611966  | 7.889642  | 0.502531  |
| N | 0.411621  | 9.675220  | 1.106339  |
| C | 0.742435  | 7.464905  | 1.484343  |
| C | 2.569104  | 7.090722  | -0.278011 |
| H | 2.152191  | 6.222215  | -0.506183 |

|                |           |           |           |
|----------------|-----------|-----------|-----------|
| H              | 2.766206  | 7.562911  | -1.125553 |
| C              | 3.873618  | 6.833681  | 0.458883  |
| H              | 4.271806  | 7.694095  | 0.744083  |
| H              | 3.699363  | 6.290173  | 1.267825  |
| C              | 1.370938  | 9.212728  | 0.319378  |
| H              | 1.840964  | 9.750263  | -0.307182 |
| <b>2_part1</b> |           |           |           |
| I              | 7.285618  | 12.294171 | 11.046024 |
| I              | 4.203584  | 10.377481 | 12.713710 |
| Co             | 3.026833  | 7.880966  | 10.134215 |
| Cl             | 3.092667  | 6.652019  | 8.247359  |
| N              | 4.615712  | 9.108614  | 9.981391  |
| N              | 6.260543  | 10.241491 | 9.034450  |
| C              | 5.365323  | 9.251907  | 8.888382  |
| H              | 5.277634  | 8.720830  | 8.105872  |
| C              | 5.078912  | 10.067851 | 10.865229 |
| C              | 6.095739  | 10.770524 | 10.296362 |
| C              | 6.706076  | 11.971396 | 7.333118  |
| H              | 6.677015  | 12.697712 | 8.005286  |
| H              | 5.789513  | 11.836022 | 6.985352  |
| C              | 7.196835  | 10.689384 | 7.989815  |
| H              | 7.287963  | 9.981940  | 7.303012  |
| H              | 8.088613  | 10.844750 | 8.390143  |
| I              | 7.065993  | 12.047829 | 2.466262  |
| I              | 10.148028 | 13.964519 | 0.798576  |
| N              | 9.735899  | 15.233386 | 3.530895  |
| N              | 8.091069  | 14.100509 | 4.477836  |
| C              | 8.986288  | 15.090093 | 4.623904  |
| H              | 9.073977  | 15.621170 | 5.406414  |
| C              | 9.272700  | 14.274149 | 2.647057  |
| C              | 8.255872  | 13.571476 | 3.215924  |
| C              | 7.645535  | 12.370604 | 6.179168  |
| H              | 7.674596  | 11.644288 | 5.507000  |
| H              | 8.562098  | 12.505978 | 6.526934  |
| C              | 7.154776  | 13.652616 | 5.522471  |
| H              | 7.063649  | 14.360060 | 6.209274  |
| H              | 6.262998  | 13.497250 | 5.122143  |
| Cl             | 2.961000  | 6.652019  | 12.021070 |
| N              | 1.437955  | 9.108614  | 10.287039 |
| I              | -1.231951 | 12.294171 | 9.222405  |
| I              | 1.850083  | 10.377481 | 7.554719  |
| N              | -0.206876 | 10.241491 | 11.233980 |
| C              | 0.688344  | 9.251907  | 11.380047 |
| H              | 0.776033  | 8.720830  | 12.162557 |
| C              | 0.974755  | 10.067851 | 9.403200  |
| C              | -0.042072 | 10.770524 | 9.972067  |
| C              | -0.652409 | 11.971396 | 12.935311 |
| H              | -0.623348 | 12.697712 | 12.263143 |
| H              | 0.264154  | 11.836022 | 13.283077 |
| C              | -1.143168 | 10.689384 | 12.278614 |
| H              | -1.234296 | 9.981940  | 12.965417 |
| H              | -2.034946 | 10.844750 | 11.878286 |

|    |           |           |            |
|----|-----------|-----------|------------|
| I  | -1.012326 | 12.047829 | 17.802167  |
| I  | -4.094361 | 13.964519 | 19.469853  |
| N  | -3.682232 | 15.233386 | 16.737534  |
| N  | -2.037402 | 14.100509 | 15.790593  |
| C  | -2.932621 | 15.090093 | 15.644525  |
| H  | -3.020310 | 15.621170 | 14.862015  |
| C  | -3.219033 | 14.274149 | 17.621372  |
| C  | -2.202206 | 13.571476 | 17.052505  |
| C  | -1.591868 | 12.370604 | 14.089261  |
| H  | -1.620929 | 11.644288 | 14.761429  |
| H  | -2.508431 | 12.505978 | 13.741495  |
| C  | -1.101109 | 13.652616 | 14.745958  |
| H  | -1.009982 | 14.360060 | 14.059155  |
| H  | -0.209331 | 13.497250 | 15.146286  |
| I  | 11.502507 | 12.294171 | -2.466262  |
| I  | 8.420472  | 10.377481 | -0.798576  |
| Co | 7.243722  | 7.880966  | -3.378072  |
| Cl | 7.309556  | 6.652019  | -5.264927  |
| N  | 8.832601  | 9.108614  | -3.530895  |
| N  | 10.477431 | 10.241491 | -4.477836  |
| C  | 9.582212  | 9.251907  | -4.623904  |
| H  | 9.494523  | 8.720830  | -5.406414  |
| C  | 9.295800  | 10.067851 | -2.647057  |
| C  | 10.312628 | 10.770524 | -3.215924  |
| C  | 10.922965 | 11.971396 | -6.179168  |
| H  | 10.893904 | 12.697712 | -5.507000  |
| H  | 10.006402 | 11.836022 | -6.526934  |
| C  | 11.413724 | 10.689384 | -5.522471  |
| H  | 11.504851 | 9.981940  | -6.209274  |
| H  | 12.305502 | 10.844750 | -5.122143  |
| I  | 11.282882 | 12.047829 | -11.046024 |
| I  | 14.364916 | 13.964519 | -12.713710 |
| N  | 13.952788 | 15.233386 | -9.981391  |
| N  | 12.307957 | 14.100509 | -9.034450  |
| C  | 13.203177 | 15.090093 | -8.888382  |
| H  | 13.290866 | 15.621170 | -8.105872  |
| C  | 13.489588 | 14.274149 | -10.865229 |
| C  | 12.472761 | 13.571476 | -10.296362 |
| C  | 11.862424 | 12.370604 | -7.333118  |
| H  | 11.891485 | 11.644288 | -8.005286  |
| H  | 12.778987 | 12.505978 | -6.985352  |
| C  | 11.371665 | 13.652616 | -7.989815  |
| H  | 11.280537 | 14.360060 | -7.303012  |
| H  | 10.479887 | 13.497250 | -8.390143  |
| Cl | 7.177889  | 6.652019  | -1.491216  |
| N  | 5.654844  | 9.108614  | -3.225248  |
| I  | 2.984937  | 12.294171 | -4.289881  |
| I  | 6.066972  | 10.377481 | -5.957567  |
| N  | 4.010013  | 10.241491 | -2.278307  |
| C  | 4.905233  | 9.251907  | -2.132239  |
| H  | 4.992922  | 8.720830  | -1.349729  |
| C  | 5.191644  | 10.067851 | -4.109086  |

|                |           |           |           |
|----------------|-----------|-----------|-----------|
| C              | 4.174817  | 10.770524 | -3.540219 |
| C              | 3.564480  | 11.971396 | -0.576975 |
| H              | 3.593540  | 12.697712 | -1.249143 |
| H              | 4.481042  | 11.836022 | -0.229209 |
| C              | 3.073721  | 10.689384 | -1.233672 |
| H              | 2.982593  | 9.981940  | -0.546869 |
| H              | 2.181942  | 10.844750 | -1.634000 |
| I              | 3.204563  | 12.047829 | 4.289881  |
| I              | 0.122528  | 13.964519 | 5.957567  |
| N              | 0.534656  | 15.233386 | 3.225248  |
| N              | 2.179487  | 14.100509 | 2.278307  |
| C              | 1.284267  | 15.090093 | 2.132239  |
| H              | 1.196578  | 15.621170 | 1.349729  |
| C              | 0.997856  | 14.274149 | 4.109086  |
| C              | 2.014683  | 13.571476 | 3.540219  |
| C              | 2.625020  | 12.370604 | 0.576975  |
| H              | 2.595960  | 11.644288 | 1.249143  |
| H              | 1.708458  | 12.505978 | 0.229209  |
| C              | 3.115779  | 13.652616 | 1.233672  |
| H              | 3.206907  | 14.360060 | 0.546869  |
| H              | 4.007558  | 13.497250 | 1.634000  |
| <b>2_part2</b> |           |           |           |
| I              | 7.285618  | 12.294171 | 11.046024 |
| I              | 4.203584  | 10.377481 | 12.713710 |
| Co             | 3.026833  | 7.880966  | 10.134215 |
| Cl             | 3.092667  | 6.652019  | 8.247359  |
| N              | 4.615712  | 9.108614  | 9.981391  |
| N              | 6.260543  | 10.241491 | 9.034450  |
| C              | 5.365323  | 9.251907  | 8.888382  |
| H              | 5.277634  | 8.720830  | 8.105872  |
| C              | 5.078912  | 10.067851 | 10.865229 |
| C              | 6.095739  | 10.770524 | 10.296362 |
| C              | 6.706076  | 11.971396 | 7.333118  |
| H              | 6.677015  | 12.697712 | 8.005286  |
| H              | 5.789513  | 11.836022 | 6.985352  |
| C              | 7.196835  | 10.689384 | 7.989815  |
| H              | 7.287963  | 9.981940  | 7.303012  |
| H              | 8.088613  | 10.844750 | 8.390143  |
| I              | 7.065993  | 12.047829 | 2.466262  |
| I              | 10.148028 | 13.964519 | 0.798576  |
| N              | 9.735899  | 15.233386 | 3.530895  |
| N              | 8.091069  | 14.100509 | 4.477836  |
| C              | 8.986288  | 15.090093 | 4.623904  |
| H              | 9.073977  | 15.621170 | 5.406414  |
| C              | 9.272700  | 14.274149 | 2.647057  |
| C              | 8.255872  | 13.571476 | 3.215924  |
| C              | 7.645535  | 12.370604 | 6.179168  |
| H              | 7.674596  | 11.644288 | 5.507000  |
| H              | 8.562098  | 12.505978 | 6.526934  |
| C              | 7.154776  | 13.652616 | 5.522471  |
| H              | 7.063649  | 14.360060 | 6.209274  |
| H              | 6.262998  | 13.497250 | 5.122143  |

|    |           |           |           |
|----|-----------|-----------|-----------|
| Cl | 2.961000  | 6.652019  | 12.021070 |
| N  | 1.437955  | 9.108614  | 10.287039 |
| I  | -1.231951 | 12.294171 | 9.222405  |
| I  | 1.850083  | 10.377481 | 7.554719  |
| N  | -0.206876 | 10.241491 | 11.233980 |
| C  | 0.688344  | 9.251907  | 11.380047 |
| H  | 0.776033  | 8.720830  | 12.162557 |
| C  | 0.974755  | 10.067851 | 9.403200  |
| C  | -0.042072 | 10.770524 | 9.972067  |
| C  | -0.652409 | 11.971396 | 12.935311 |
| H  | -0.623348 | 12.697712 | 12.263143 |
| H  | 0.264154  | 11.836022 | 13.283077 |
| C  | -1.143168 | 10.689384 | 12.278614 |
| H  | -1.234296 | 9.981940  | 12.965417 |
| H  | -2.034946 | 10.844750 | 11.878286 |
| I  | -1.012326 | 12.047829 | 17.802167 |
| I  | -4.094361 | 13.964519 | 19.469853 |
| N  | -3.682232 | 15.233386 | 16.737534 |
| N  | -2.037402 | 14.100509 | 15.790593 |
| C  | -2.932621 | 15.090093 | 15.644525 |
| H  | -3.020310 | 15.621170 | 14.862015 |
| C  | -3.219033 | 14.274149 | 17.621372 |
| C  | -2.202206 | 13.571476 | 17.052505 |
| C  | -1.591868 | 12.370604 | 14.089261 |
| H  | -1.620929 | 11.644288 | 14.761429 |
| H  | -2.508431 | 12.505978 | 13.741495 |
| C  | -1.101109 | 13.652616 | 14.745958 |
| H  | -1.009982 | 14.360060 | 14.059155 |
| H  | -0.209331 | 13.497250 | 15.146286 |
| I  | 1.096118  | 4.180171  | 11.046024 |
| I  | -1.985916 | 2.263481  | 12.713710 |
| N  | -1.573788 | 0.994614  | 9.981391  |
| N  | 0.071043  | 2.127491  | 9.034450  |
| C  | -0.824177 | 1.137907  | 8.888382  |
| H  | -0.911866 | 0.606830  | 8.105872  |
| C  | -1.110588 | 1.953851  | 10.865229 |
| C  | -0.093761 | 2.656524  | 10.296362 |
| C  | 0.516576  | 3.857396  | 7.333118  |
| H  | 0.487515  | 4.583712  | 8.005286  |
| H  | -0.399987 | 3.722022  | 6.985352  |
| C  | 1.007335  | 2.575384  | 7.989815  |
| H  | 1.098463  | 1.867940  | 7.303012  |
| H  | 1.899113  | 2.730750  | 8.390143  |
| I  | 0.876493  | 3.933829  | 2.466262  |
| I  | 3.958528  | 5.850519  | 0.798576  |
| N  | 3.546399  | 7.119386  | 3.530895  |
| N  | 1.901569  | 5.986509  | 4.477836  |
| C  | 2.796788  | 6.976093  | 4.623904  |
| H  | 2.884477  | 7.507170  | 5.406414  |
| C  | 3.083200  | 6.160149  | 2.647057  |
| C  | 2.066372  | 5.457476  | 3.215924  |
| C  | 1.456035  | 4.256604  | 6.179168  |

|                |           |          |           |
|----------------|-----------|----------|-----------|
| H              | 1.485096  | 3.530288 | 5.507000  |
| H              | 2.372598  | 4.391978 | 6.526934  |
| C              | 0.965276  | 5.538616 | 5.522471  |
| H              | 0.874149  | 6.246060 | 6.209274  |
| H              | 0.073498  | 5.383250 | 5.122143  |
| Co             | 5.135278  | 8.347034 | 3.378072  |
| Cl             | 5.069444  | 9.575981 | 5.264927  |
| Cl             | 5.201111  | 9.575981 | 1.491216  |
| N              | 6.724156  | 7.119386 | 3.225248  |
| I              | 9.394063  | 3.933829 | 4.289881  |
| I              | 6.312028  | 5.850519 | 5.957567  |
| N              | 8.368987  | 5.986509 | 2.278307  |
| C              | 7.473767  | 6.976093 | 2.132239  |
| H              | 7.386078  | 7.507170 | 1.349729  |
| C              | 7.187356  | 6.160149 | 4.109086  |
| C              | 8.204183  | 5.457476 | 3.540219  |
| C              | 8.814520  | 4.256604 | 0.576975  |
| H              | 8.785460  | 3.530288 | 1.249143  |
| H              | 7.897958  | 4.391978 | 0.229209  |
| C              | 9.305279  | 5.538616 | 1.233672  |
| H              | 9.396407  | 6.246060 | 0.546869  |
| H              | 10.197058 | 5.383250 | 1.634000  |
| I              | 9.174437  | 4.180171 | -4.289881 |
| I              | 12.256472 | 2.263481 | -5.957567 |
| N              | 11.844344 | 0.994614 | -3.225248 |
| N              | 10.199513 | 2.127491 | -2.278307 |
| C              | 11.094733 | 1.137907 | -2.132239 |
| H              | 11.182422 | 0.606830 | -1.349729 |
| C              | 11.381144 | 1.953851 | -4.109086 |
| C              | 10.364317 | 2.656524 | -3.540219 |
| C              | 9.753980  | 3.857396 | -0.576975 |
| H              | 9.783040  | 4.583712 | -1.249143 |
| H              | 10.670542 | 3.722022 | -0.229209 |
| C              | 9.263221  | 2.575384 | -1.233672 |
| H              | 9.172093  | 1.867940 | -0.546869 |
| H              | 8.371442  | 2.730750 | -1.634000 |
| <b>3_part1</b> |           |          |           |
| I              | 1.156525  | 5.870451 | -0.629135 |
| I              | -0.339658 | 6.422039 | 3.046477  |
| I              | 4.981606  | 7.394024 | 10.131915 |
| I              | 3.369303  | 5.920553 | 13.453606 |
| I              | -0.472069 | 1.609441 | 10.839377 |
| I              | 2.750357  | 1.722749 | 13.961290 |
| Cu             | 0.848658  | 3.401254 | 12.283596 |
| Cu             | 1.527013  | 0.635452 | 11.998449 |
| N              | 2.681010  | 4.017281 | 1.207728  |
| N              | 1.833197  | 4.300167 | 3.228403  |
| N              | 2.862829  | 5.388235 | 9.283890  |
| N              | 1.981869  | 4.540504 | 11.137977 |
| C              | 1.664571  | 4.930994 | 1.136567  |
| C              | 1.126119  | 5.123695 | 2.378744  |
| C              | 2.752583  | 3.659165 | 2.474296  |

|    |           |           |            |
|----|-----------|-----------|------------|
| H  | 3.374672  | 3.027506  | 2.814776   |
| C  | 1.682773  | 4.134598  | 4.678280   |
| H  | 1.904330  | 3.200244  | 4.918317   |
| H  | 0.735675  | 4.291503  | 4.921573   |
| C  | 2.558280  | 5.069893  | 5.486701   |
| H  | 2.284436  | 6.009350  | 5.336068   |
| H  | 3.504836  | 4.971276  | 5.215257   |
| C  | 2.390330  | 4.700523  | 6.963986   |
| H  | 1.429188  | 4.729182  | 7.200918   |
| H  | 2.712175  | 3.775634  | 7.108345   |
| C  | 3.154212  | 5.641522  | 7.866702   |
| H  | 4.125353  | 5.530788  | 7.708136   |
| H  | 2.913505  | 6.575737  | 7.645235   |
| C  | 2.916844  | 5.496456  | 11.482593  |
| C  | 3.468083  | 6.026462  | 10.353570  |
| C  | 1.982360  | 4.517688  | 9.809175   |
| H  | 1.424896  | 3.950669  | 9.289761   |
| I  | 2.294603  | -1.722749 | 11.183993  |
| Cu | 3.517947  | -0.635452 | 13.146834  |
| I  | 5.517029  | -1.609441 | 14.305906  |
| Cu | 4.196302  | -3.401254 | 12.861687  |
| I  | -1.156525 | 9.545649  | 0.629135   |
| I  | 0.339658  | 8.994061  | -3.046477  |
| I  | -4.981606 | 8.022076  | -10.131915 |
| I  | -3.369303 | 9.495547  | -13.453606 |
| N  | -2.681010 | 11.398819 | -1.207728  |
| N  | -1.833197 | 11.115933 | -3.228403  |
| N  | -2.862829 | 10.027865 | -9.283890  |
| N  | -1.981869 | 10.875596 | -11.137977 |
| C  | -1.664571 | 10.485106 | -1.136567  |
| C  | -1.126119 | 10.292405 | -2.378744  |
| C  | -2.752583 | 11.756935 | -2.474296  |
| H  | -3.374672 | 12.388594 | -2.814776  |
| C  | -1.682773 | 11.281502 | -4.678280  |
| H  | -1.904330 | 12.215856 | -4.918317  |
| H  | -0.735675 | 11.124597 | -4.921573  |
| C  | -2.558280 | 10.346207 | -5.486701  |
| H  | -2.284436 | 9.406750  | -5.336068  |
| H  | -3.504836 | 10.444824 | -5.215257  |
| C  | -2.390330 | 10.715577 | -6.963986  |
| H  | -1.429188 | 10.686918 | -7.200918  |
| H  | -2.712175 | 11.640466 | -7.108345  |
| C  | -3.154212 | 9.774578  | -7.866702  |
| H  | -4.125353 | 9.885312  | -7.708136  |
| H  | -2.913505 | 8.840363  | -7.645235  |
| C  | -2.916844 | 9.919644  | -11.482593 |
| C  | -3.468083 | 9.389638  | -10.353570 |
| C  | -1.982360 | 10.898412 | -9.809175  |
| H  | -1.424896 | 11.465431 | -9.289761  |
| I  | -2.858815 | 1.837599  | -6.915456  |
| I  | -4.354998 | 1.286011  | -3.239844  |
| I  | 0.966266  | 0.314026  | 3.845594   |



|                |           |          |           |
|----------------|-----------|----------|-----------|
| I              | -0.646037 | 1.787497 | 7.167286  |
| N              | -1.334330 | 3.690769 | -5.078593 |
| N              | -2.182143 | 3.407883 | -3.057918 |
| N              | -1.152511 | 2.319815 | 2.997569  |
| N              | -2.033471 | 3.167546 | 4.851657  |
| C              | -2.350769 | 2.777056 | -5.149754 |
| C              | -2.889221 | 2.584355 | -3.907577 |
| C              | -1.262757 | 4.048885 | -3.812025 |
| H              | -0.640668 | 4.680544 | -3.471545 |
| C              | -2.332567 | 3.573452 | -1.608041 |
| H              | -2.111010 | 4.507806 | -1.368004 |
| H              | -3.279665 | 3.416547 | -1.364748 |
| C              | -1.457060 | 2.638157 | -0.799620 |
| H              | -1.730904 | 1.698700 | -0.950253 |
| H              | -0.510504 | 2.736774 | -1.071063 |
| C              | -1.625010 | 3.007527 | 0.677665  |
| H              | -2.586152 | 2.978868 | 0.914597  |
| H              | -1.303165 | 3.932416 | 0.822024  |
| C              | -0.861128 | 2.066528 | 1.580381  |
| H              | 0.110013  | 2.177262 | 1.421815  |
| H              | -1.101835 | 1.132313 | 1.358914  |
| C              | -1.098496 | 2.211594 | 5.196273  |
| C              | -0.547257 | 1.681588 | 4.067250  |
| C              | -2.032980 | 3.190362 | 3.522854  |
| H              | -2.590444 | 3.757381 | 3.003441  |
| <b>3_part2</b> |           |          |           |
| I              | 1.156525  | 5.870451 | -0.629135 |
| I              | -0.339658 | 6.422039 | 3.046477  |
| I              | 4.981606  | 7.394024 | 10.131915 |
| I              | 3.369303  | 5.920553 | 13.453606 |
| I              | -0.472069 | 1.609441 | 10.839377 |
| I              | 2.750357  | 1.722749 | 13.961290 |
| Cu             | 0.848658  | 3.401254 | 12.283596 |
| Cu             | 1.527013  | 0.635452 | 11.998449 |
| N              | 2.681010  | 4.017281 | 1.207728  |
| N              | 1.833197  | 4.300167 | 3.228403  |
| N              | 2.862829  | 5.388235 | 9.283890  |
| N              | 1.981869  | 4.540504 | 11.137977 |
| C              | 1.664571  | 4.930994 | 1.136567  |
| C              | 1.126119  | 5.123695 | 2.378744  |
| C              | 2.752583  | 3.659165 | 2.474296  |
| H              | 3.374672  | 3.027506 | 2.814776  |
| C              | 1.682773  | 4.134598 | 4.678280  |
| H              | 1.904330  | 3.200244 | 4.918317  |
| H              | 0.735675  | 4.291503 | 4.921573  |
| C              | 2.558280  | 5.069893 | 5.486701  |
| H              | 2.284436  | 6.009350 | 5.336068  |
| H              | 3.504836  | 4.971276 | 5.215257  |
| C              | 2.390330  | 4.700523 | 6.963986  |
| H              | 1.429188  | 4.729182 | 7.200918  |
| H              | 2.712175  | 3.775634 | 7.108345  |
| C              | 3.154212  | 5.641522 | 7.866702  |

|    |          |           |           |
|----|----------|-----------|-----------|
| H  | 4.125353 | 5.530788  | 7.708136  |
| H  | 2.913505 | 6.575737  | 7.645235  |
| C  | 2.916844 | 5.496456  | 11.482593 |
| C  | 3.468083 | 6.026462  | 10.353570 |
| C  | 1.982360 | 4.517688  | 9.809175  |
| H  | 1.424896 | 3.950669  | 9.289761  |
| I  | 2.294603 | -1.722749 | 11.183993 |
| Cu | 3.517947 | -0.635452 | 13.146834 |
| I  | 5.517029 | -1.609441 | 14.305906 |
| Cu | 4.196302 | -3.401254 | 12.861687 |
| I  | 6.874155 | 9.545649  | 13.201776 |
| I  | 8.370339 | 8.994061  | 9.526165  |
| I  | 3.049074 | 8.022076  | 2.440727  |
| I  | 4.661377 | 9.495547  | -0.880965 |
| N  | 5.349670 | 11.398819 | 11.364914 |
| N  | 6.197483 | 11.115933 | 9.344239  |
| N  | 5.167851 | 10.027865 | 3.288752  |
| N  | 6.048812 | 10.875596 | 1.434664  |
| C  | 6.366109 | 10.485106 | 11.436075 |
| C  | 6.904561 | 10.292405 | 10.193898 |
| C  | 5.278097 | 11.756935 | 10.098346 |
| H  | 4.656008 | 12.388594 | 9.757866  |
| C  | 6.347907 | 11.281502 | 7.894362  |
| H  | 6.126350 | 12.215856 | 7.654325  |
| H  | 7.295005 | 11.124597 | 7.651068  |
| C  | 5.472400 | 10.346207 | 7.085941  |
| H  | 5.746244 | 9.406750  | 7.236574  |
| H  | 4.525844 | 10.444824 | 7.357384  |
| C  | 5.640350 | 10.715577 | 5.608655  |
| H  | 6.601492 | 10.686918 | 5.371724  |
| H  | 5.318505 | 11.640466 | 5.464296  |
| C  | 4.876468 | 9.774578  | 4.705940  |
| H  | 3.905327 | 9.885312  | 4.864506  |
| H  | 5.117175 | 8.840363  | 4.927407  |
| C  | 5.113836 | 9.919644  | 1.090048  |
| C  | 4.562597 | 9.389638  | 2.219071  |
| C  | 6.048320 | 10.898412 | 2.763467  |
| H  | 6.605784 | 11.465431 | 3.282880  |
| I  | 5.171865 | 1.837599  | 5.657186  |
| I  | 3.675682 | 1.286011  | 9.332798  |
| I  | 8.996946 | 0.314026  | 16.418235 |
| I  | 7.384643 | 1.787497  | 19.739927 |
| N  | 6.696350 | 3.690769  | 7.494049  |
| N  | 5.848537 | 3.407883  | 9.514724  |
| N  | 6.878169 | 2.319815  | 15.570211 |
| N  | 5.997209 | 3.167546  | 17.424298 |
| C  | 5.679911 | 2.777056  | 7.422888  |
| C  | 5.141459 | 2.584355  | 8.665065  |
| C  | 6.767923 | 4.048885  | 8.760617  |
| H  | 7.390012 | 4.680544  | 9.101096  |
| C  | 5.698113 | 3.573452  | 10.964601 |
| H  | 5.919670 | 4.507806  | 11.204638 |

|   |          |          |           |
|---|----------|----------|-----------|
| H | 4.751015 | 3.416547 | 11.207894 |
| C | 6.573620 | 2.638157 | 11.773021 |
| H | 6.299776 | 1.698700 | 11.622389 |
| H | 7.520176 | 2.736774 | 11.501578 |
| C | 6.405670 | 3.007527 | 13.250307 |
| H | 5.444528 | 2.978868 | 13.487238 |
| H | 6.727515 | 3.932416 | 13.394666 |
| C | 7.169552 | 2.066528 | 14.153023 |
| H | 8.140693 | 2.177262 | 13.994456 |
| H | 6.928845 | 1.132313 | 13.931555 |
| C | 6.932184 | 2.211594 | 17.768914 |
| C | 7.483423 | 1.681588 | 16.639891 |
| C | 5.997700 | 3.190362 | 16.095496 |
| H | 5.440236 | 3.757381 | 15.576082 |
